# Supplementary material for: Code-Free Development and Deployment of Deep Segmentation Models for Digital Pathology
Source: PubMed Central journal article supplement (PMC8829033; doi:10.3389/fmed.2021.816281), 2022-01-27
Supplement: Data_Sheet_1.pdf [file Data_Sheet_1.pdf]

# Supplementary Material

## 1 Supplementary Data

The dataset used in this study consisting of 251 (HE and CD3-stained) colon biopsy WSIs is made openly available at DataVerseNO (<https://doi.org/10.18710/TLA01U>). All source code and a tutorial video can be found in the GitHub repository (<https://github.com/andrepd/NoCodeSeg>).

## 2 Supplementary Figures and Tables

### 2.1 Supplementary Figures

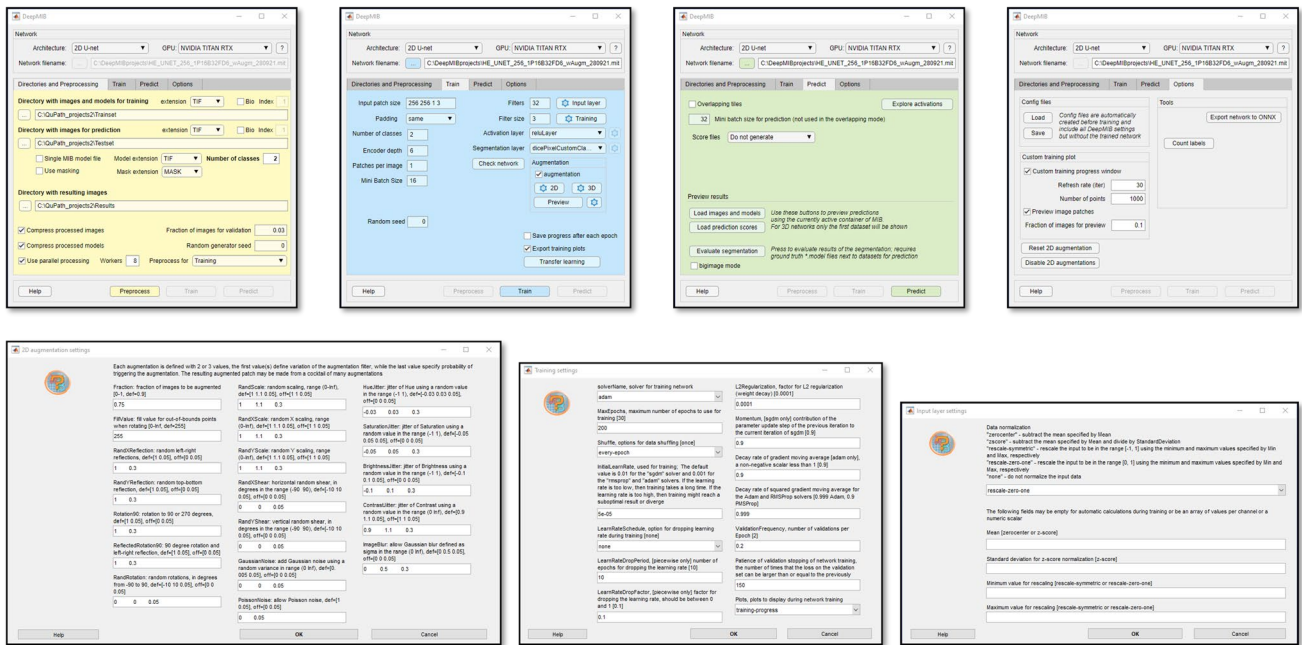

**Supplementary Figure 1.** Example of training hyperparameters used in this study - screenshots from DeepMIB. All trainings had the same hyperparameters indicated by the figure, except for the variables indicated in Table 1 in the main paper (i.e., patch size [64x64 – 512x512], number of filters [32 or 64], batch size [16-64]).

### Architecture

**Type of available CNN architecture**

- 2D U-Net
- 2D SegNet
- 3D U-Net
- 3D U-Net Anisotropic

### Input layer settings

**Data normalization**

- zero-center
- z-score
- rescale-symmetric
- rescale-zero-one
- none

**Mean** for zero-center or z-score

**Standard deviation** for z-score

**Minimum value for rescaling** for rescale-symmetric or rescale-zero-one

**Maximum value for rescaling** for rescale-symmetric or rescale-zero-one

### Training settings

**Network solver**

- adam
- rmsprop
- sgd

**Max number of Epochs** *maximum number of epochs to use for training*

**Shuffle data**

- every-epoch
- once
- never

**Initial learning rate** *initial learning rate for training*

**Learn rate schedule**

- none
- piecewise

**Learn rate drop factor [for piecewise]** *factor for dropping the learning rate during training*

**L2 regularization** *weight decay factor for L2 regularization*

**Momentum [sgdm only]** *contribution of the parameter update step of the previous iteration to the current iteration*

**Gradient decay factor [adam only]** *decay rate of gradient moving average*

**Squared gradient decay factor [adam, rmsprop only]** *decay rate of squared gradient moving average*

**Validation frequency** *number of validations per Epoch*

**Validation patience** *patience of validation stopping of network training*

**Plots and Display**

- training-progress
- none

### Segmentation layer settings

**Segmentation layer**

- pixel classification layer
- focal loss layer
- dice pixel classification layer
- custom dice pixel classification layer

### Activation layer settings

**Activation layer**

- relu layer
- leaky relu layer
- clipped relu layer
- elu layer
- tanh layer

### Augmentation settings

|                                      | 2D  | 3D  |                          | 2D  | 3D |
|--------------------------------------|-----|-----|--------------------------|-----|----|
| <b>Fraction of images to augment</b> | yes | yes |                          |     |    |
| <b>Random X reflection</b>           | yes | yes | <b>Random X shear</b>    | yes | no |
| <b>Random Y reflection</b>           | yes | yes | <b>Random Y shear</b>    | yes | no |
| <b>Random Z reflection</b>           | NA  | yes | <b>Gaussian noise</b>    | yes | no |
| <b>Rotation 90 degrees</b>           | yes | yes | <b>Poisson noise</b>     | yes | no |
| <b>Reflected rotation 90 degrees</b> | yes | yes | <b>Hue jitter</b>        | yes | no |
| <b>Random rotation</b>               | yes | no  | <b>Saturation jitter</b> | yes | no |
| <b>Random scaling</b>                | yes | no  | <b>Brightness jitter</b> | yes | no |
| <b>Random X scaling</b>              | yes | no  | <b>Contrast jitter</b>   | yes | no |
| <b>Random Y scaling</b>              | yes | no  | <b>Image blur</b>        | yes | no |

**Supplementary Figure 2:** The graphical user interface of DeepMIB with explanation of the available options for training of 2D U-Net, 2D SegNet, and 3D U-Net deep segmentation networks.

## 2.2 Supplementary Tables

**Supplementary Table 2. Estimated mean IoU and difference compared to the U-Net 512x512 algorithm on the HE and CD3 datasets using mixed linear regression.**

| Dataset | Architecture and hyperparameters           | Estimated margin mean IOU |                       |                       | Comparison to HE/CD3 U-Net 512x512 |                       |                       |                          |
|---------|--------------------------------------------|---------------------------|-----------------------|-----------------------|------------------------------------|-----------------------|-----------------------|--------------------------|
|         |                                            | mean                      | 95 % CI (lower limit) | 95 % CI (upper limit) | Estimated difference in IOU        | 95 % CI (lower limit) | 95 % CI (upper limit) | p-value                  |
| HE      | <b>U-Net 512x512, 32 filters, 16 batch</b> | <b>0.952</b>              | <b>0.944</b>          | <b>0.960</b>          | <b>0.000</b>                       | .                     | .                     | .                        |
|         | U-Net 256x256, 32 filters, 16 batch        | 0.936                     | 0.919                 | 0.953                 | -0.016                             | -0.028                | -0.003                | 0.013                    |
|         | U-Net 256x256, 32 filters, 32 batch        | 0.932                     | 0.916                 | 0.948                 | -0.019                             | -0.030                | -0.009                | 2.16 x 10 <sup>-4</sup>  |
|         | U-Net 256x256, 64 filters, 32 batch        | 0.932                     | 0.916                 | 0.949                 | -0.019                             | -0.030                | -0.008                | 5.07 x 10 <sup>-4</sup>  |
|         | U-Net 128x128, 32 filters, 16 batch        | 0.929                     | 0.911                 | 0.947                 | -0.023                             | -0.036                | -0.010                | 6.82 x 10 <sup>-4</sup>  |
|         | U-Net 64x64, 32 filters, 16 batch          | 0.921                     | 0.902                 | 0.940                 | -0.031                             | -0.044                | -0.017                | 6.27 x 10 <sup>-6</sup>  |
|         | SegNet 512x512, 32 filters, 16 batch       | 0.925                     | 0.912                 | 0.938                 | -0.027                             | -0.034                | -0.019                | 4.00 x 10 <sup>-12</sup> |
|         | SegNet 256x256, 32 filters, 16 batch       | 0.935                     | 0.921                 | 0.949                 | -0.017                             | -0.025                | -0.009                | 5.88 x 10 <sup>-5</sup>  |
|         | SegNet 128x128, 32 filters, 16 batch       | 0.902                     | 0.882                 | 0.922                 | -0.050                             | -0.064                | -0.035                | 6.03 x 10 <sup>-11</sup> |
| CD3     | <b>U-Net 512x512, 32 filters, 16 batch</b> | <b>0.958</b>              | <b>0.948</b>          | <b>0.968</b>          | <b>0.000</b>                       | .                     | .                     | .                        |
|         | U-Net 256x256, 32 filters, 16 batch        | 0.933                     | 0.913                 | 0.953                 | -0.025                             | -0.038                | -0.011                | 2.40 x 10 <sup>-4</sup>  |
|         | SegNet 512x512, 32 filters, 16 batch       | 0.919                     | 0.905                 | 0.934                 | -0.038                             | -0.048                | -0.028                | 6.81 x 10 <sup>-14</sup> |
|         | SegNet 256x256, 32 filters, 16 batch       | 0.899                     | 0.883                 | 0.915                 | -0.058                             | -0.068                | -0.049                | 2.39 x 10 <sup>-32</sup> |

*Each architecture was compared to the single best performing architecture (U-Net 512x512 32 filters, depth 6, 16 batch, indicated in **bold**) for the HE/CD3 datasets separately, and the estimated mean difference is presented together with 95 % CI and p-values using two-level mixed regression models, where architecture is level 1, image patch is level 2, and with robust variance estimates clustered by WSI and a random intercept for patch.*
